# Supplementary material for: Heterotrophy and symbiosis affect energy reserves for pedal lacerates in the sea anemone Exaiptasia diaphana
Source: PeerJ journal article supplement (doi:10.7717/peerj.20851), 2026-02-25

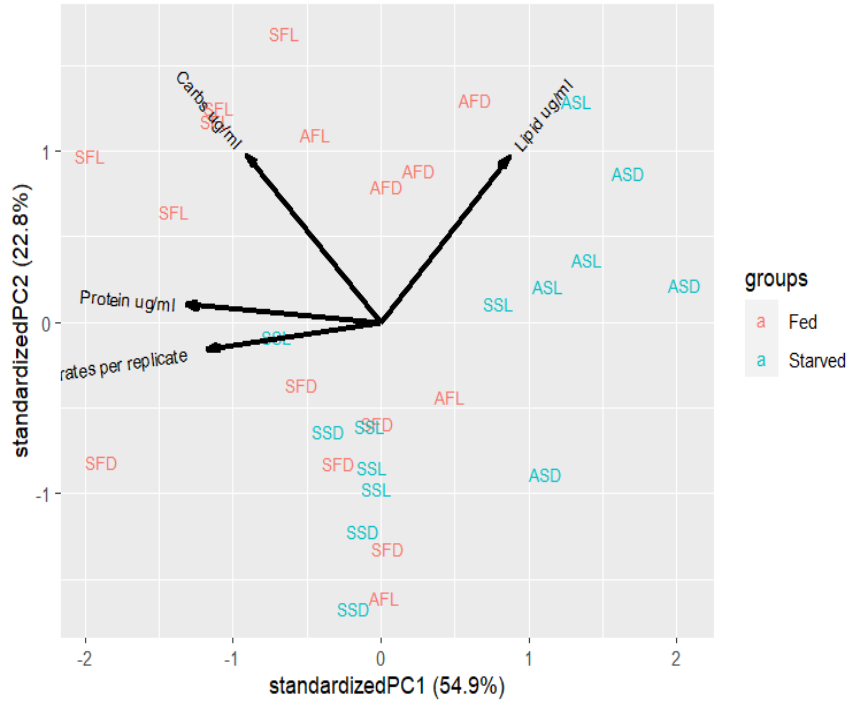

Supplement: Supplemental_Figure_1.pdf [file Supplemental_Figure_1.pdf]
